# Supplementary material for: Mcl-1 inhibition overcomes intrinsic and acquired regorafenib resistance in colorectal cancer
Source: PubMed Central journal article supplement (PMC7381732; doi:10.7150/thno.45363), 2020-07-09
Supplement: thnov10p8098s1.pdf [file thnov10p8098s1.pdf]

**Table S1. List of reagents**

| <b>Reagents</b>                                                      | <b>Source</b>             | <b>Catalogue #</b> |
|----------------------------------------------------------------------|---------------------------|--------------------|
| <b>Anticancer agents and solvents</b>                                |                           |                    |
| Regorafenib (for cell)                                               | Active Biochem            | #A-1486            |
| Regorafenib (for animal)                                             | LC Laboratories           | #R-8024            |
| Sorafenib                                                            | LC Laboratories           | #S-8599            |
| S63845                                                               | Fisher Scientific         | #50-149-2689       |
| AZD5991                                                              | WeiYuan Biotech           | #A-6097            |
| AGM176                                                               | WeiYuan Biotech           | #A-6056            |
| DMSO                                                                 | Sigma-Aldrich             | #D2650-5X          |
| (2-Hydroxypropyl)- $\beta$ -cyclodextrin                             | Cayman Chemical           | #16169             |
| Cremophor EL™                                                        | Fisher Scientific         | #23-847-01SET      |
| <b>Antibodies</b>                                                    |                           |                    |
| Mouse monoclonal, Mcl-1                                              | BD Biosciences            | # 559027           |
| Mouse monoclonal, $\beta$ -Actin                                     | Sigma-Aldrich             | #A5441             |
| Mouse monoclonal, cleaved caspase 8                                  | Cell Signaling Technology | #9746              |
| Rabbit polyclonal, cleaved caspase 3                                 | Cell Signaling Technology | #9661              |
| Rabbit polyclonal, cleaved caspase 9                                 | Cell Signaling Technology | #9502              |
| Rabbit polyclonal, PUMA                                              | QCB                       | #3795              |
| Rabbit polyclonal, Bid                                               | Cell Signaling Technology | #2002              |
| Rabbit polyclonal, Bcl-X <sub>L</sub>                                | BD Biosciences            | #610212            |
| Rabbit polyclonal, Bim                                               | Cell Signaling Technology | #2819              |
| Mouse monoclonal, Bcl-2                                              | Dako                      | # M0887            |
| Mouse monoclonal, Noxa                                               | EMD Millipore             | # OP180            |
| Goat anti-mouse secondary antibodies                                 | Pierce                    | #31432             |
| Goat anti-Rabbit secondary antibodies                                | Pierce                    | #31462             |
| Goat anti-Rabbit secondary antibodies, AlexaFluor 488                | Invitrogen                | #A11012            |
| <b>Kits</b>                                                          |                           |                    |
| Tali™ Apoptosis Kit - Annexin V Alexa Fluor™ 488/Propidium Iodide    | Invitrogen                | #A10788            |
| CellTiter-Glo® 3D Cell Viability Assay                               | Promega                   | #G9681             |
| SensoLyte® Homogeneous AMC Caspase - 3/7 Assay Kit                   | AnaSpec                   | #AS-71118          |
| ApopTag Fluorescein In Situ Apoptosis Detection Kit (for TUNEL)      | EMD Millipore             | #S7110             |
| CellTiter 96 AQueous One Solution Cell Proliferation Assay (MTS) Kit | Promega                   | #G3580             |
| Zymoclean Gel DNA Recovery Kit                                       | ZYMO Research             | #D4002             |

|                                       |                     |         |
|---------------------------------------|---------------------|---------|
| Quick-gDNA Minipre Kit                | ZYMO Research       | #D3025  |
| VectaShield + DAPI                    | Vector Laboratories | #H-1500 |
| CellTiter-Glo 3D Cell Viability Assay | Promega             | #G9681  |

**Reagents for organoid culture**

|                                       |                   |           |
|---------------------------------------|-------------------|-----------|
| L-WRN cells                           | ATCC              | #CRL-3276 |
| Matrigel matrix, Phenol-Red-free      | Corning           | #356231   |
| Advanced DMEM/F-12                    | ThermoFisher      | #12634010 |
| Penicillin-Streptomycin (10,000 U/mL) | ThermoFisher      | #15140122 |
| HEPES (1 M)                           | ThermoFisher      | #15630106 |
| B-27 Supplement (50X), serum free     | ThermoFisher      | #17504044 |
| N-2 Supplement (100X)                 | ThermoFisher      | #17502048 |
| N-acetylcysteine amide                | Sigma             | #A0737    |
| GlutaMAX Supplement                   | ThermoFisher      | #35050061 |
| [Leu15]-Gastrin I human               | Sigma             | #G9145    |
| Nicotinamide                          | Sigma             | #N0636    |
| SB 202190                             | Sigma             | #S7067    |
| Recombinant Murine EGF                | Peprtech          | #315-09   |
| A 83-01                               | Tocris Bioscience | #2939     |

---

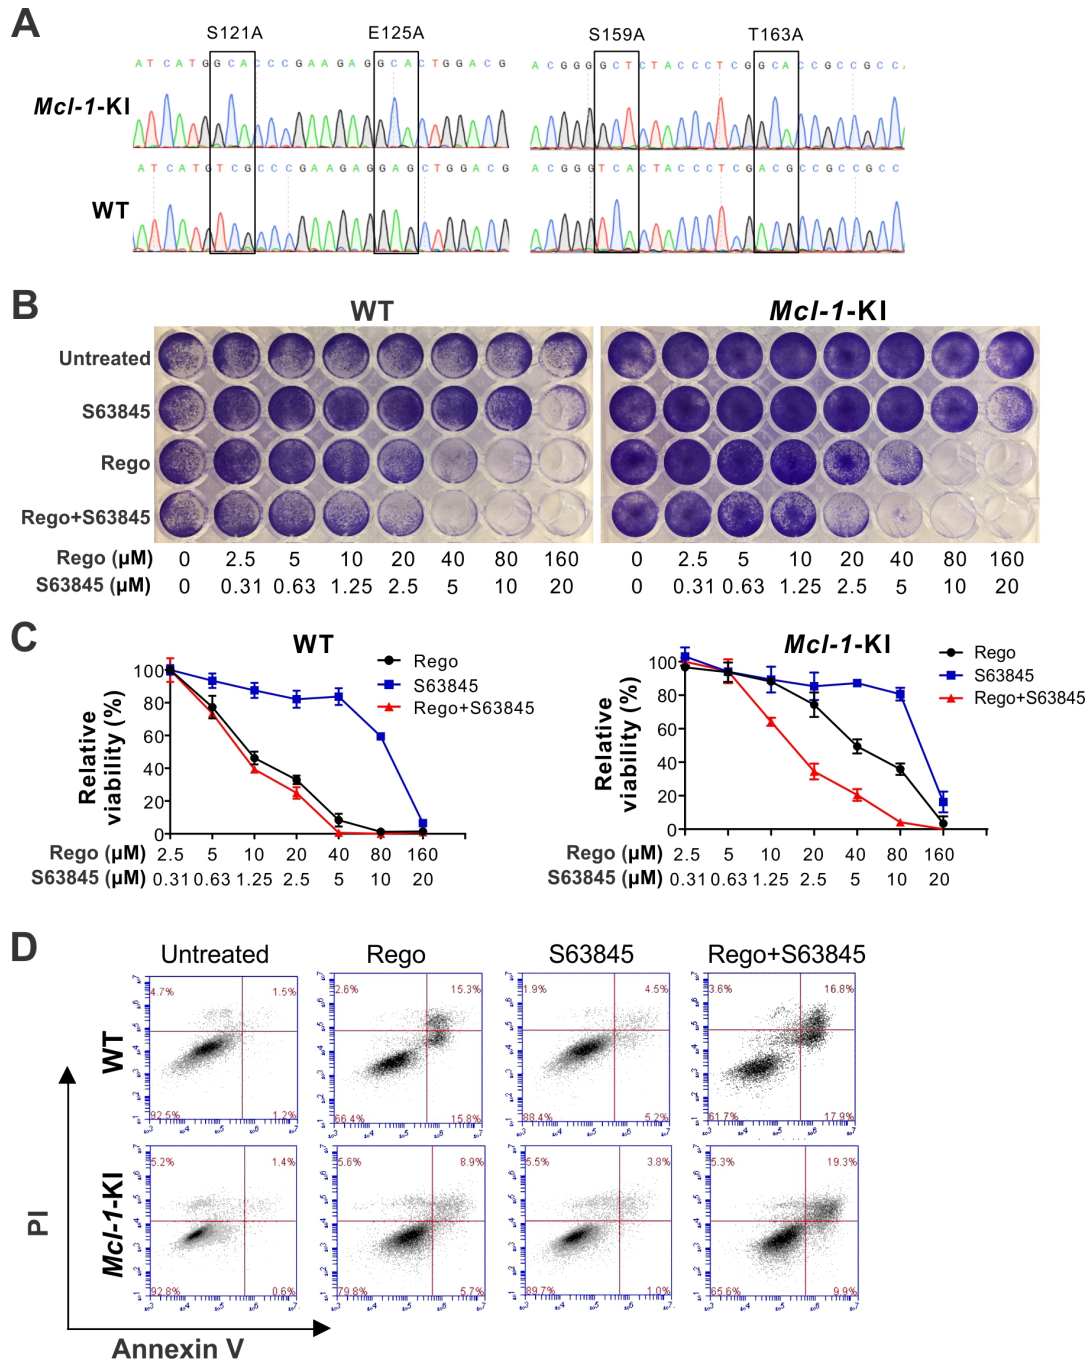

**Figure S1. *Mcl-1* inhibitors restore regorafenib sensitivity in *Mcl-1-KI* cells.** (A) DNA sequencing of the targeted genomic regions in WT and *Mcl-1* knock-in (*Mcl-1-KI*) HCT116 cells highlighting WT and corresponding mutant sequences. (B) WT and *Mcl-1-KI* HCT116 cells treated with regorafenib combined with S63845 at indicated concentrations for 48 hours. Cell viability was analyzed by crystal violet staining and representative pictures are shown. (C) The results from B were quantified and expressed as means  $\pm$  s.d. of three independent experiments. (D) Apoptosis in WT and *Mcl-1-KI* HCT116 cells treated with regorafenib (40  $\mu\text{M}$ ), S63845 (5  $\mu\text{M}$ ), or their combination for 48 hours was analyzed by annexin V/propidium iodide (PI) staining followed by flow cytometry. Signals in two right quadrants represent early (Annexin V<sup>+</sup>/PI<sup>-</sup>) and late (Annexin V<sup>+</sup>/PI<sup>+</sup>) apoptotic cells.

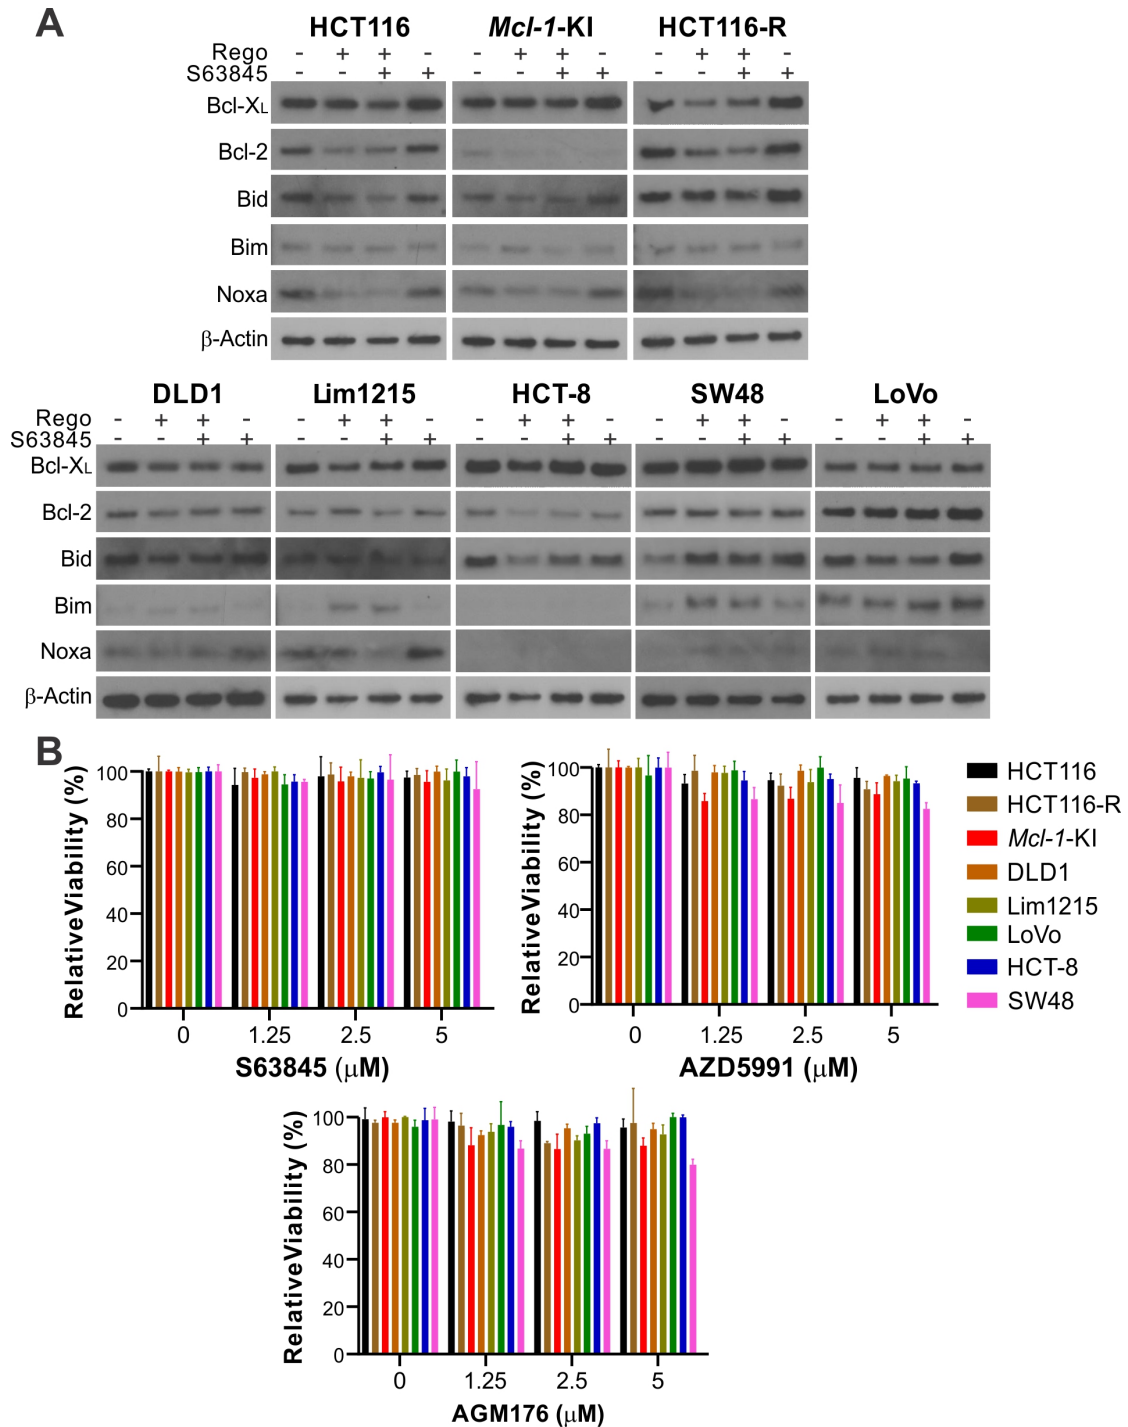

**Figure S2. Effects of *Mcl-1* inhibitors on the expression Bcl-2 family proteins and viability of CRC cells.** Parental, *Mcl-1* knock-in (*Mcl-1*-KI) and regorafenib-resistant (HCT116-R) HCT116 cells, along with *FBW7*-WT DLD1 and Lim1215 and *FBW7*-mutant LoVo, HCT-8 and SW480 cells, were treated with regorafenib, an *Mcl-1* inhibitor, or their combination. (A) Western blotting of indicated Bcl-2 family proteins in cells treated with regorafenib (40  $\mu$ M), S63845 (5  $\mu$ M), or their combination for 24 hours. (B) MTS analysis of viability of cells treated with different *Mcl-1* inhibitors at indicated concentrations for 48 hours. Results were expressed as means  $\pm$  s.d. of three independent experiments.

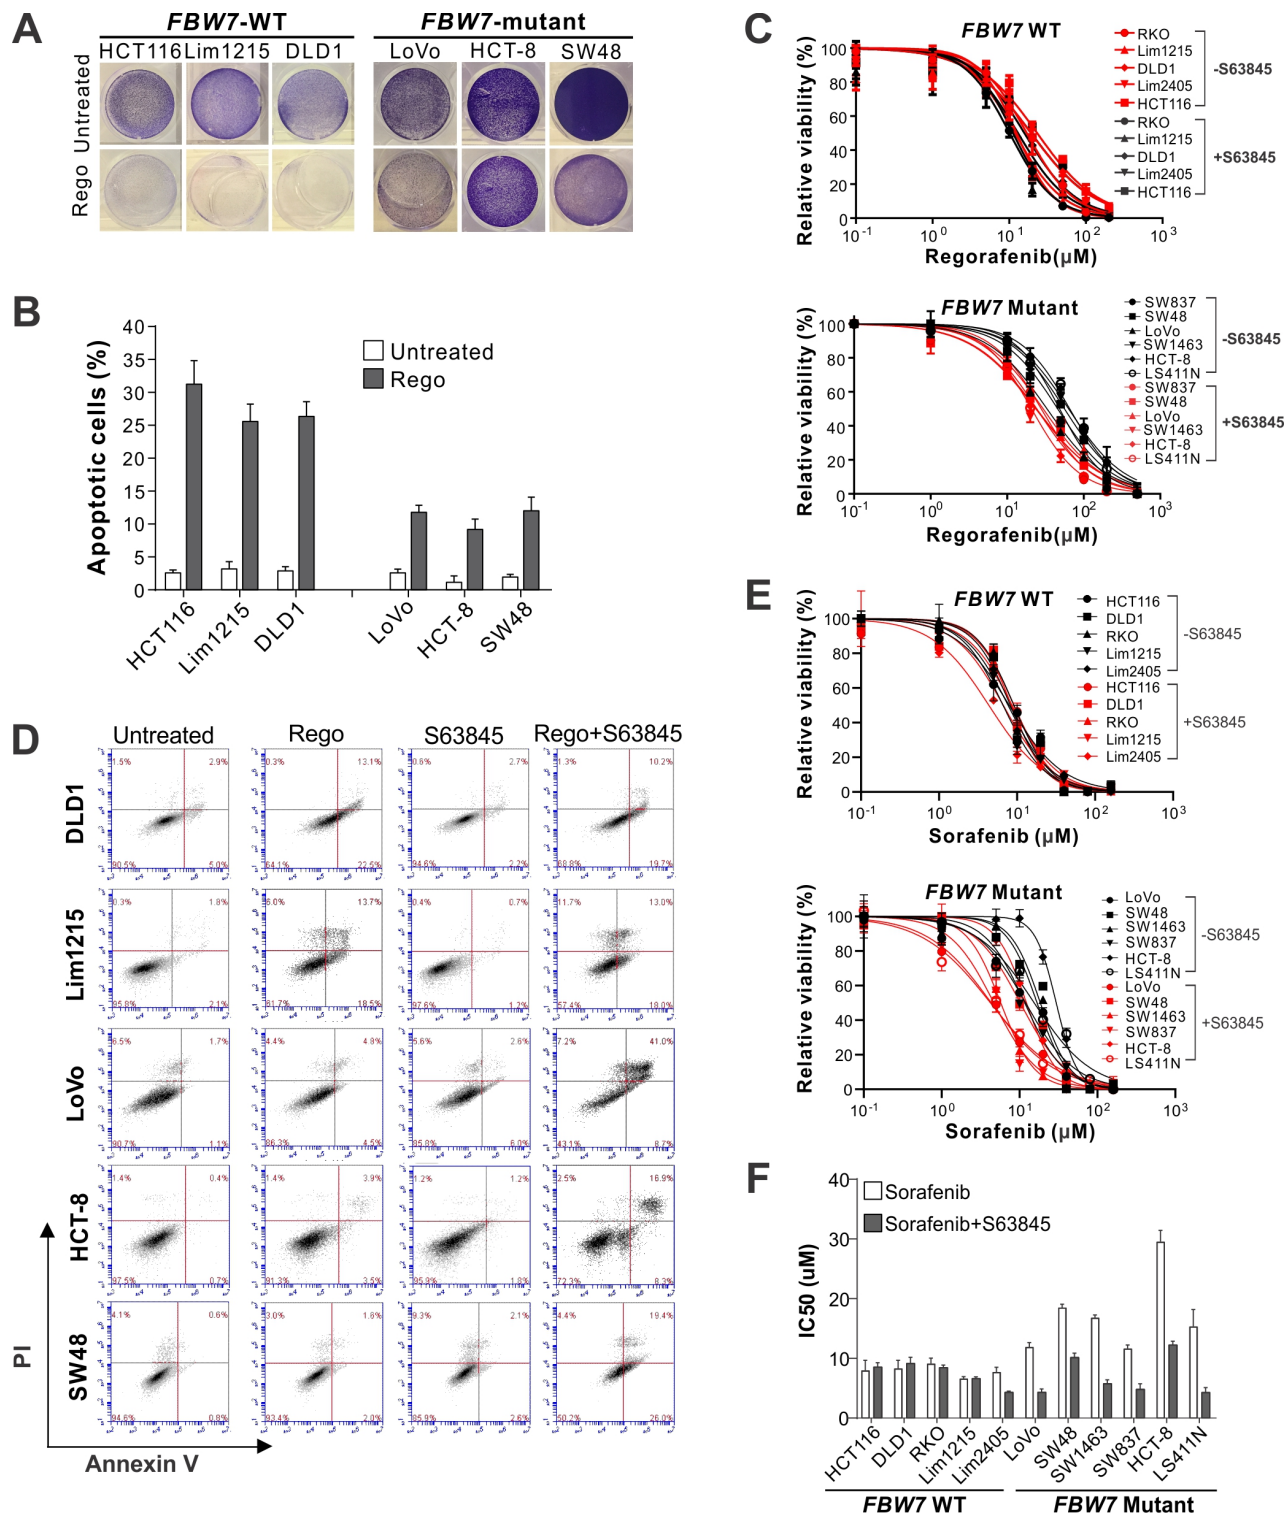

**Figure S3. Mcl-1 inhibitors sensitize *FBW7*-mutant CRC cells to regorafenib and sorafenib.** (A) Crystal violet staining of indicated WT and *FBW7*-mutant cell lines treated with regorafenib (40  $\mu$ M) for 48 hours. (B) Apoptosis in cells treated as in A was analyzed by counting condensed and fragment nuclei after nuclear staining. (C) MTS analysis of indicated WT and *FBW7*-mutant CRC cell lines treated with regorafenib at indicated concentrations alone or in combination with S63845 (5  $\mu$ M) for 72 hours. (D) Apoptosis in *FBW7*-WT Lim1215 and DLD1 cells and *FBW7*-

mutant LoVo, HCT-8, and SW48 cells treated with regorafenib (40  $\mu$ M), S63845 (5  $\mu$ M), or their combination for 48 hours was analyzed by annexin V/PI followed by flow cytometry. Signals in two right quadrants represent early (Annexin V+/PI-) and late (Annexin V+/PI+) apoptotic cells. (E) MTS analysis of indicated WT and *FBW7*-mutant CRC cell lines treated with sorafenib at indicated concentrations alone or in combination with S63845 (5  $\mu$ M) for 72 hours. (F) Comparison of sorafenib  $IC_{50}$  in indicated WT and *FBW7*-mutant CRC cell lines treated with sorafenib alone or in combination with S63845 (5  $\mu$ M) for 72 hours. Results in **B**, **C**, **E** and **F** were expressed as means  $\pm$  s.d. of three independent experiments.

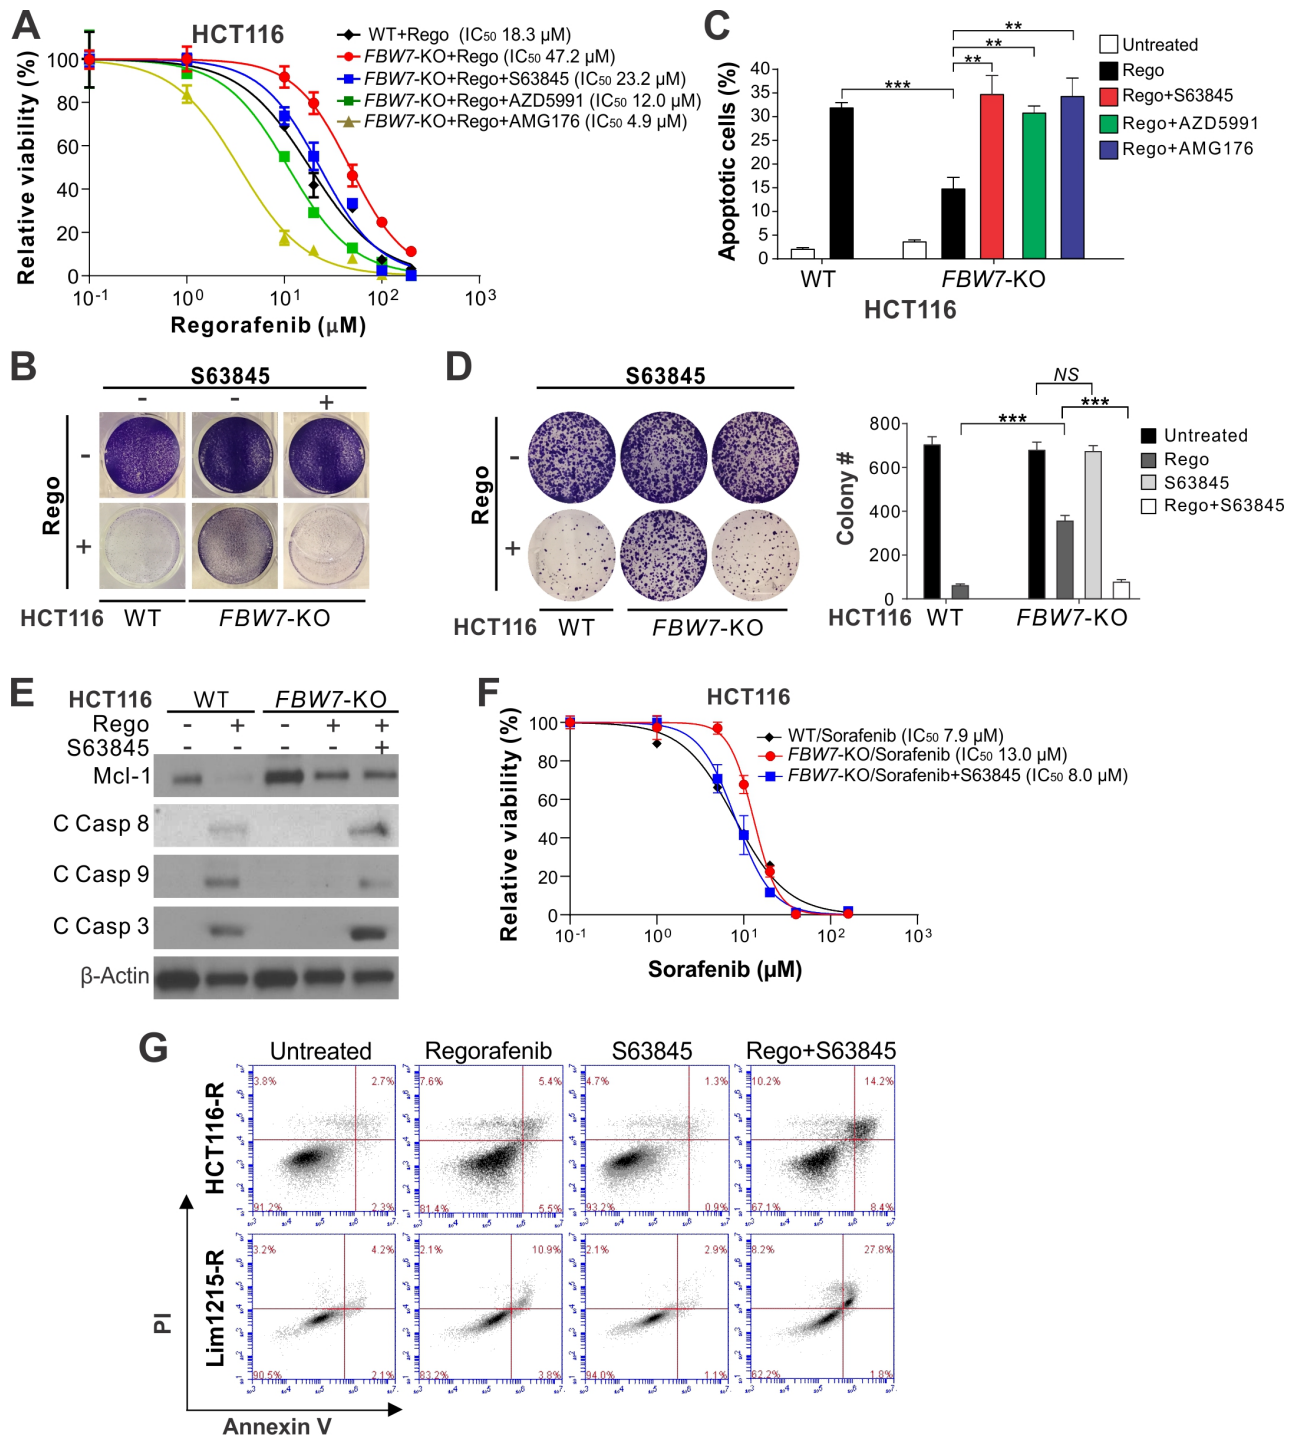

**Figure S4. Mcl-1 inhibitors restore regorafenib or sorafenib sensitivity in *FBW7*-KO and regorafenib-resistant CRC cells.** (A) MTS analysis of WT and *FBW7*-KO HCT116 cells treated with regorafenib at indicated concentrations alone or in combination with an indicated Mcl-1 inhibitor (5  $\mu\text{M}$ ) for 72 hours. (B) Crystal violet staining of WT and *FBW7*-KO HCT116 cells treated with regorafenib (40  $\mu\text{M}$ ) alone or in combination with S63845 (5  $\mu\text{M}$ ) for 48 hours. (C) Apoptosis in cells treated as in A and B for 48 hours was analyzed by counting condensed and fragment nuclei after nuclear staining. (D) Colony formation of cells treated as in B. *Upper panel*: representative pictures of colonies visualized by crystal violet staining 2 weeks after treatment;

*lower panel*: enumeration of colony numbers. **(E)** Western blotting of cleaved (C) caspases 3, 8, and 9 in cells treated as in **B**. **(F)** MTS analysis of indicated WT and *FBW7*-KO HCT116 cells treated with sorafenib at indicated concentrations alone or in combination with S63845 (5  $\mu$ M) for 72 hours. **(G)** Apoptosis in regorafenib-resistant HCT116 (HCT116-R) and Lim1215 (Lim1215-R) cells treated with regorafenib (40  $\mu$ M), S63845 (5  $\mu$ M), or their combination for 48 hours was analyzed by annexin V/PI followed by flow cytometry. Signals in two right quadrants represent early (Annexin V+/PI-) and late (Annexin V+/PI+) apoptotic cells. Results in **A**, **C**, **D** and **F** were expressed as means  $\pm$  s.d. of three independent experiments. \*\*,  $P < 0.01$ ; \*\*\*,  $P < 0.001$ .



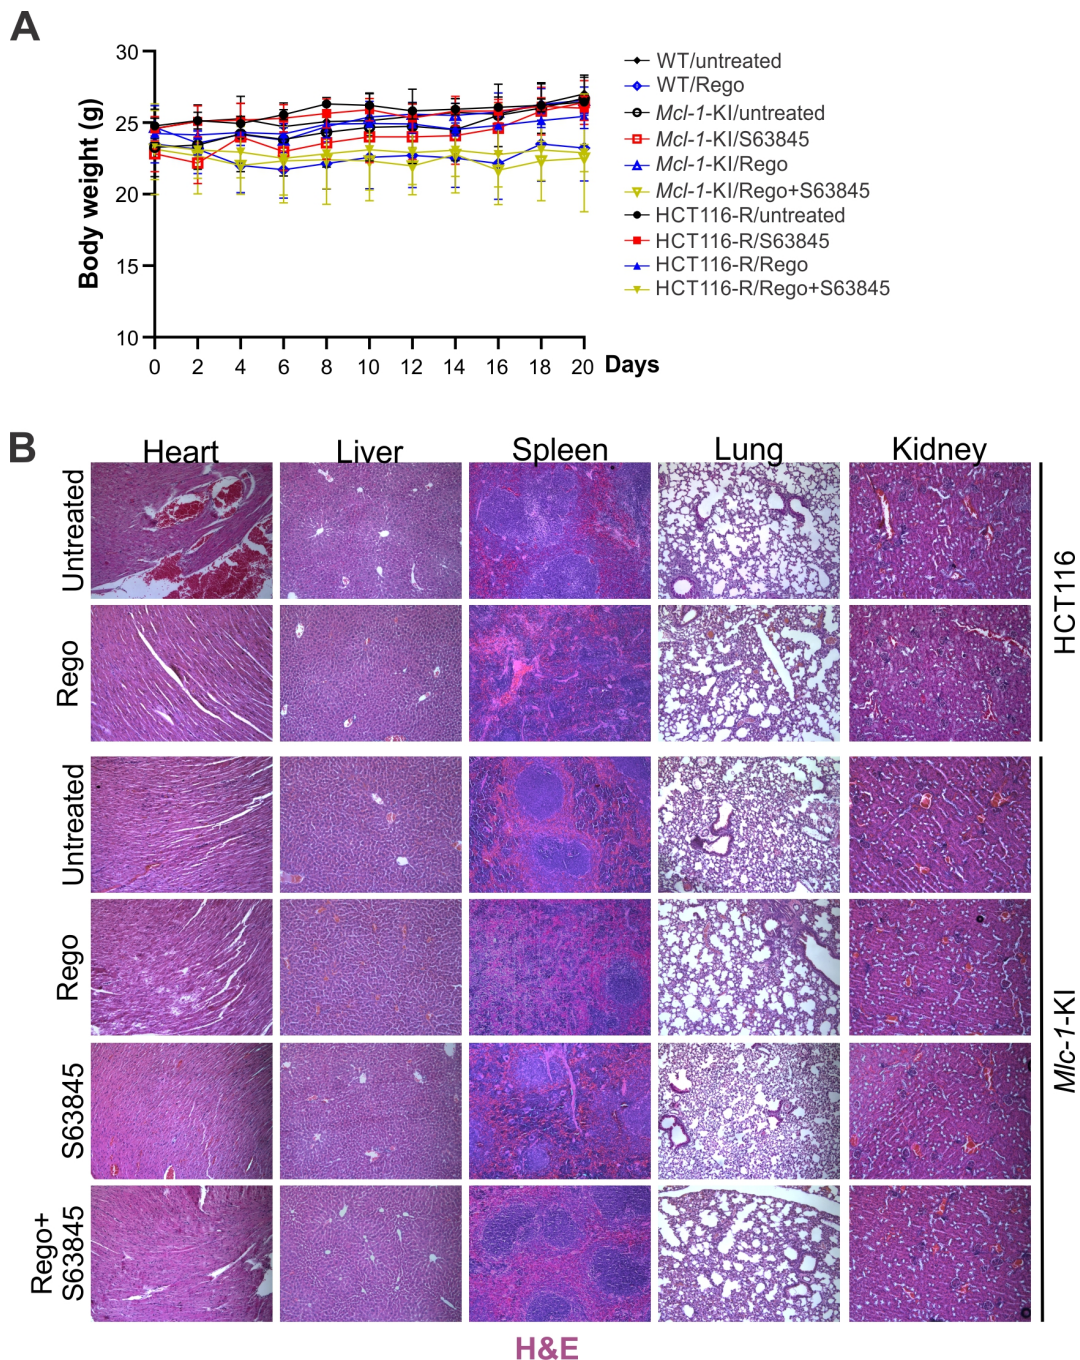

**Figure S5. The regorafenib/S63845 combination is well tolerated in nude mice.** (A) Body weight of nude mice harboring indicated xenograft tumors (n=6) at indicated time points after treatment with regorafenib (oral gavage; 20 mg/kg) alone or in combination with S63845 (i.p.; 20 mg/kg). (B) H&E staining of the indicated tissues from randomly selected mice harboring indicated xenograft tumors at the end of experiments in A.

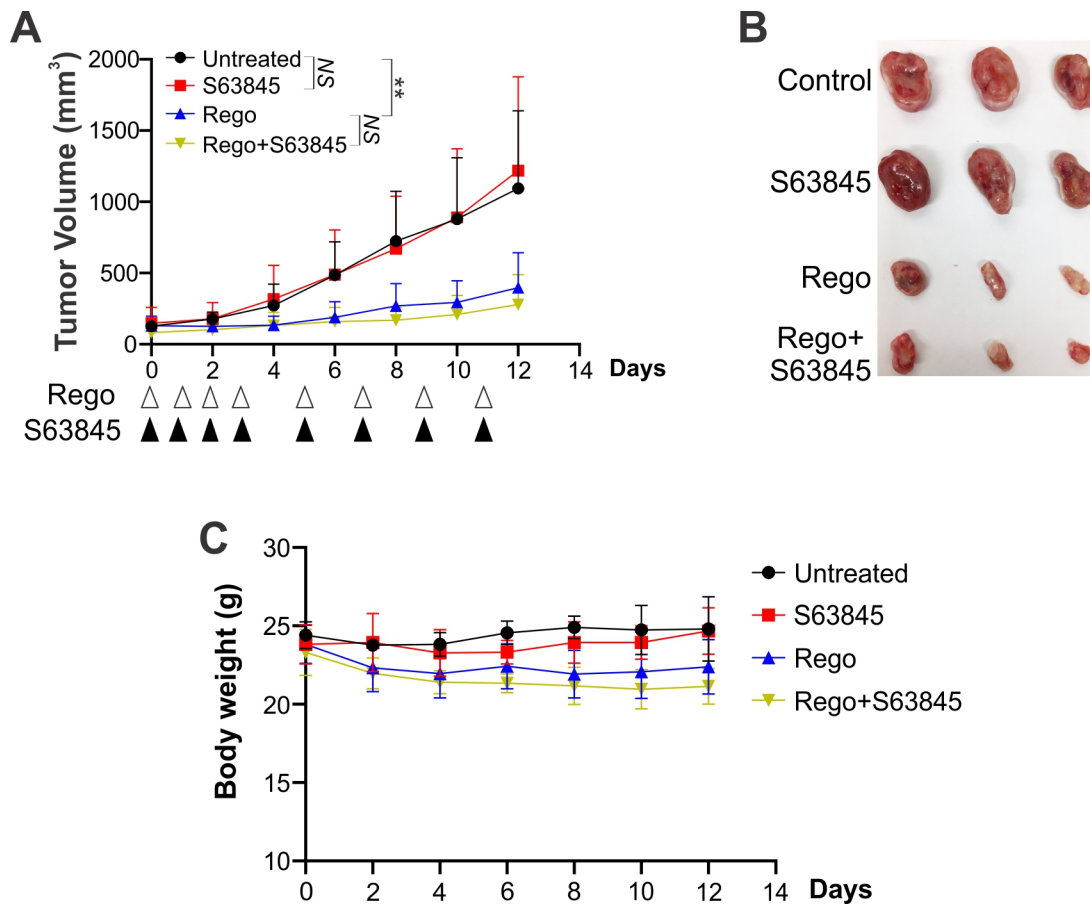

**Figure S6. Effects of the regorafenib/S63845 combination in the CT26 syngeneic tumor model.** (A) BABL/cJ mice were injected subcutaneously with  $5 \times 10^5$  WT CT26 cells. After tumor growth for 7 days, mice were treated with regorafenib (oral gavage; 20 mg/kg), S63845 (i.p.; 20 mg/kg), or their combination with S63845 (i.p.; 20 mg/kg) as indicated. Tumor volume at indicated time points after treatment was calculated and plotted (n=6-8 in each group). (B) Representative pictures of tumors at the end of the experiment in A. (C) Body weight of tumor-bearing mice at indicated time points. *NS*,  $P > 0.05$ ; \*\*,  $P < 0.01$ .

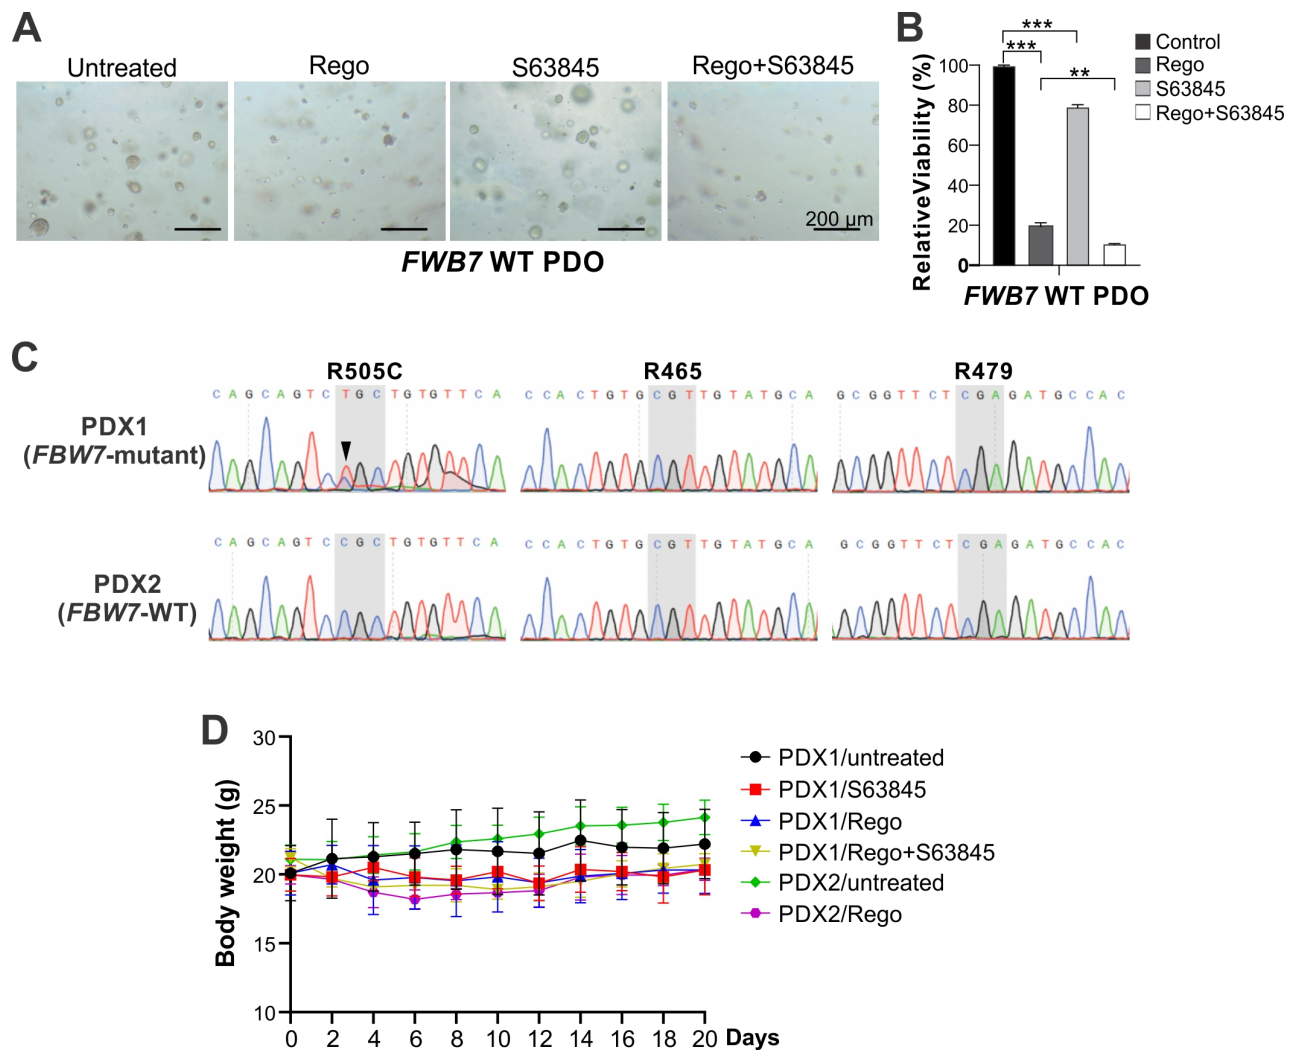

**Figure S7. Effects of the regorafenib/S63845 combination in patient-derived models.** (A) and (B) Representative images (A) and quantification (B) of *FBW7*-WT CRC PDO treated with regorafenib (20  $\mu$ M) alone or in combination with S63845 (1  $\mu$ M) for 48 hours. Results were expressed as means  $\pm$  s.d. of three independent experiments. (C) DNA sequencing of the targeted genomic regions in indicated patient-derived xenograft (PDX) tumors highlighting WT and corresponding *FBW7* mutant sequences. (D) Body weight of NOD/SCID mice (n=6) harboring indicated PDX tumors at indicated time points after treatment with regorafenib (oral gavage; 20 mg/kg) alone or in combination with S63845 (i.p.; 20 mg/kg).
